# Supplementary material for: Dual-modal imaging and excellent anticancer efficiency of cisplatin and doxorubicin loaded NaGdF4:Yb3+/Er3+ nanoparticles
Source: Royal Society of Chemistry journal article supplement (doi:10.1039/c8ra03898h), 2018-01-01
Supplement: c8ra03898h1.pdf [file c8ra03898h1.pdf]

# Dual-modal imaging and excellent anticancer efficiency of cisplatin and doxorubicin loaded $\text{NaGdF}_4:\text{Yb}^{3+}/\text{Er}^{3+}$ nanoparticles

Zhiyang Zhang, Jiayi Sheng, Miaomiao Zhang, Xiaoyan Ma, Zhirong Geng\*,  
Zhilin Wang\*

*State Key Laboratory of Coordination Chemistry, Collaborative In-novation Center of Advanced Microstructure, School of Chemistry and Chemical Engineering, Nanjing University, Nanjing 210023, P.R. China.*

*\*Address correspondence to: Zhirong Geng and Zhilin Wang, State Key Laboratory of Coordination Chemistry, Collaborative In-novation Center of Advanced Microstructure, School of Chemistry and Chemical Engineering, Nanjing University, Nanjing 210023, PR China. Tel.:86-25-89689026. Fax: 86-25-89687761. E-mail: [gengzr@nju.edu.cn](mailto:gengzr@nju.edu.cn), [wangzl@nju.edu.cn](mailto:wangzl@nju.edu.cn)*

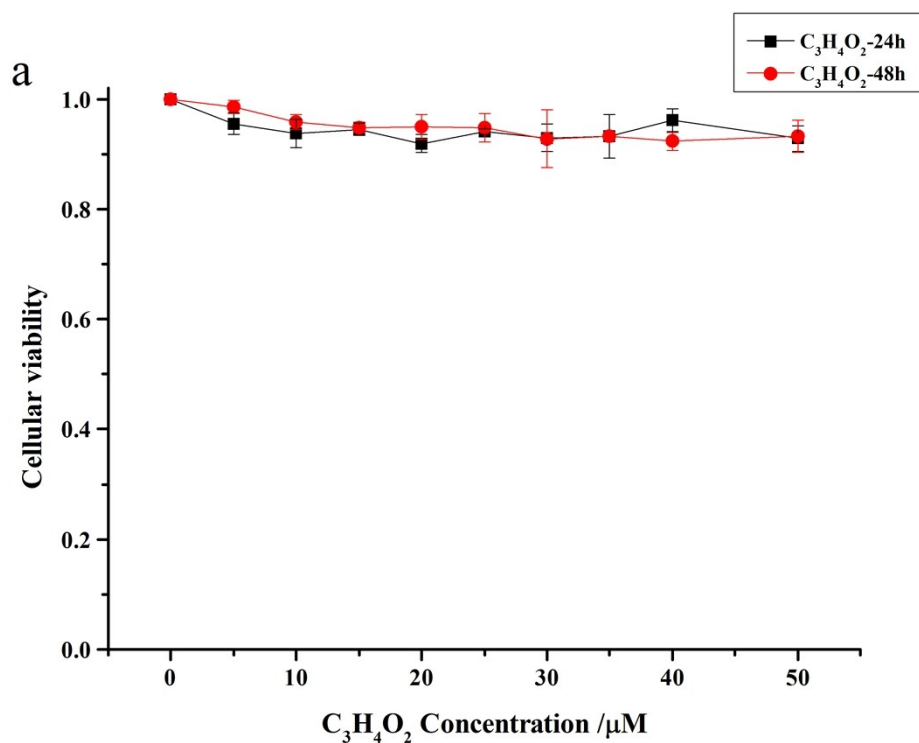

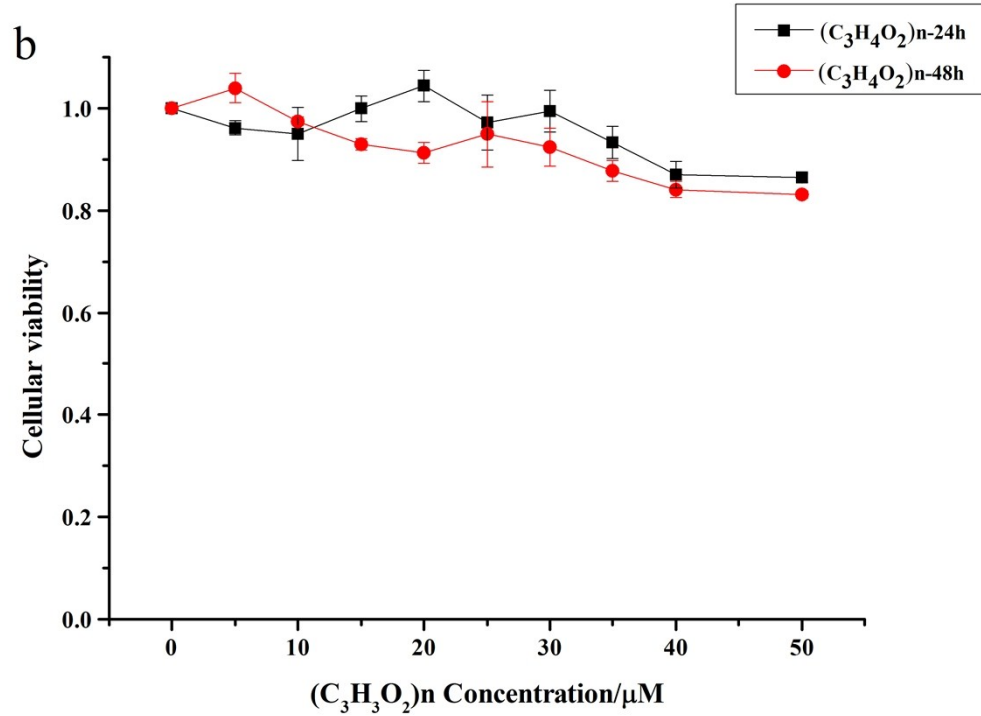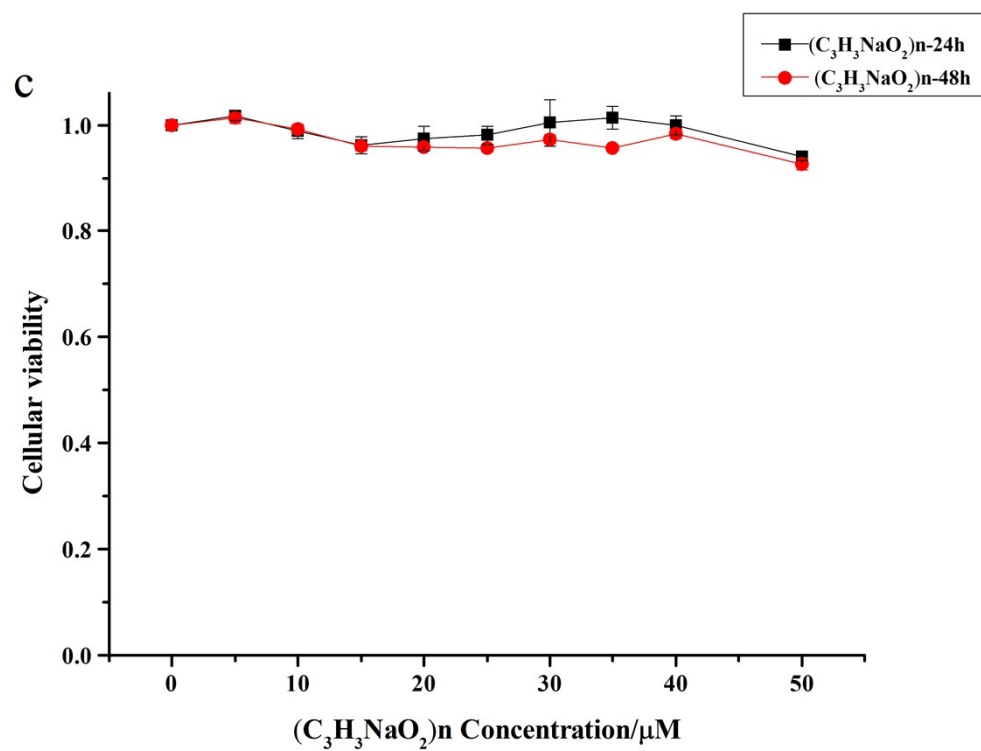

Fig. S1 Cytotoxicity of acrylate, polyacrylate and sodium polyacrylate against HeLa cancer cell lines at 24 and 48 h. a. acrylate; b. polyacrylate; c. sodium polyacrylate
